# Supplementary material
Source: PubMed Central journal article supplement (PMC4373745)
Supplement: supp_M056986_jlr.M056986-1.pdf [file supp_M056986_jlr.M056986-1.pdf]

## Supplementary Figure Legends

Supplementary Figure 1. **Evidence of protein-protein interaction of yeast ergosterol synthetic enzymes.** (A) Table compiled using data from the STRING database (<http://string-db.org/>) based on experimental evidence, where '+' indicates high confidence for interaction, with scores of at least 0.7. (B) Yeast ergosterol synthesis protein network compiled using the high-confidence yeast protein-protein interaction dataset updated from [1] as described in [2]. The pink nodes are the ergosterol synthesis enzymes, and the grey nodes are their interaction partners.

Supplementary Figure 2. **Ion  $m/z$  values monitored during selective ion monitoring (SIM) analysis of the  $N,O$ -bis(trimethylsilyl)trifluoroacetamide derivatives.** (A) A simplified schematic illustrating our metabolic labelling strategy. (B) Chromatograms and mass spectra of the [ $^2\text{D}_6$ ]-desmosterol and [ $^2\text{D}_7$ ]-7DHC standards, and their relative retention times with respect to the  $5\alpha$ -cholestane internal standard (IS). (C) The SIM ions for  $5\alpha$ -cholestane were monitored from 27 to 32 min (width 0.1 Da, dwell 120 ms); for [ $^2\text{D}_6$ ]-cholesterol and [ $^2\text{D}_7$ ]-cholesterol from 32 to 35.5 min (width 0.1 Da, dwell 120 ms); for [ $^2\text{D}_6$ ]-desmosterol and [ $^2\text{D}_7$ ]-7DHC from 35.5 to 38 min (width 0.1 Da, Dwell 200 ms).

# Supplementary Figures

## Supplementary Figure 1

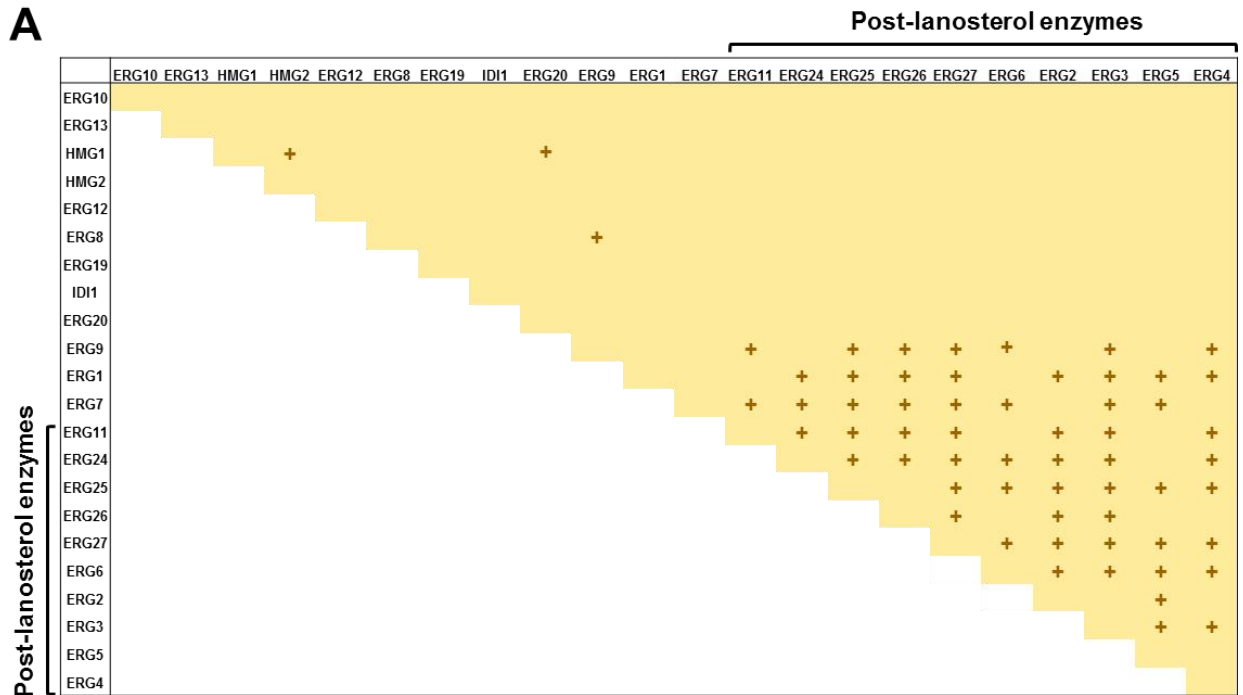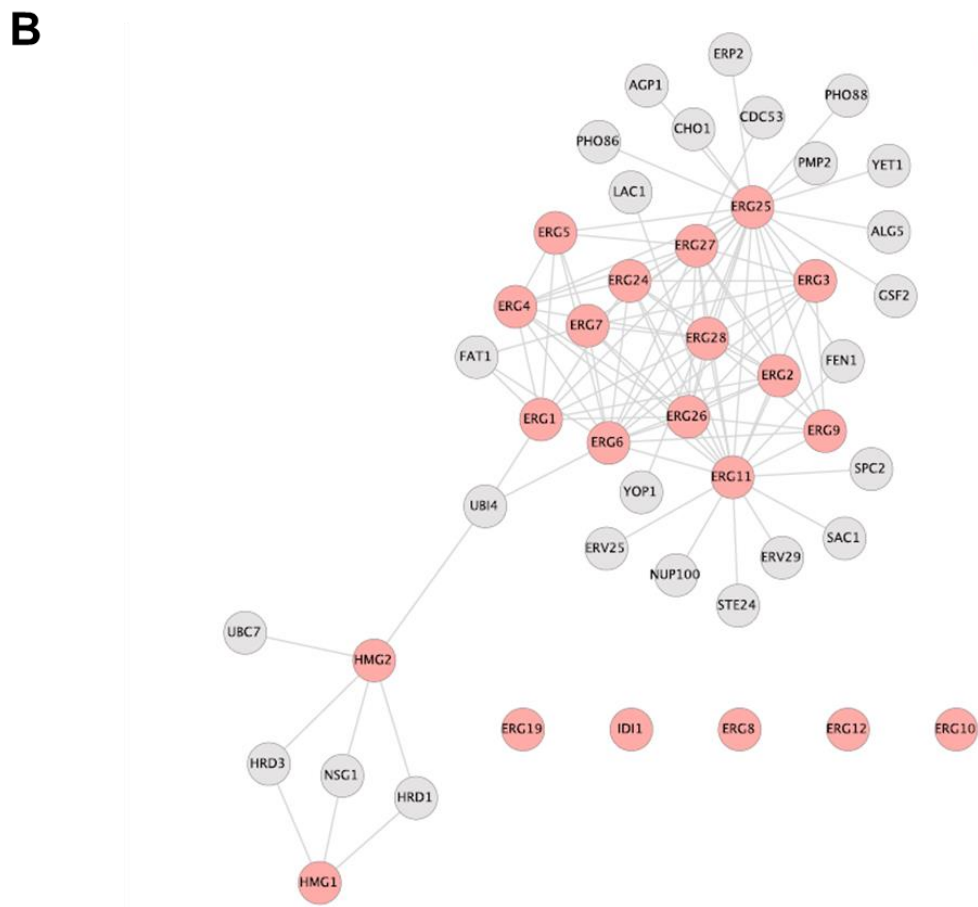

Supplementary Figure 2

**A**

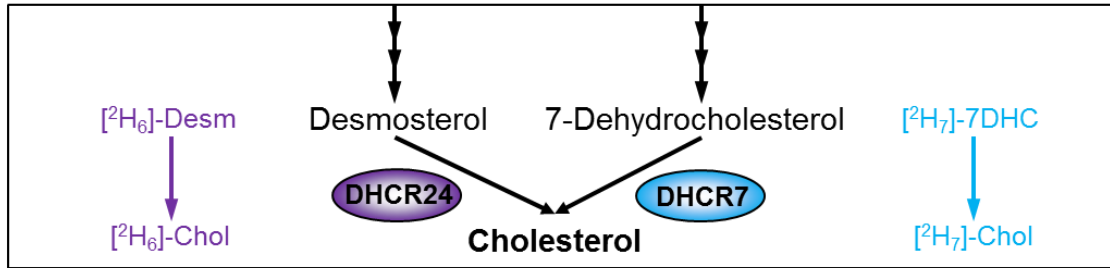

**B**

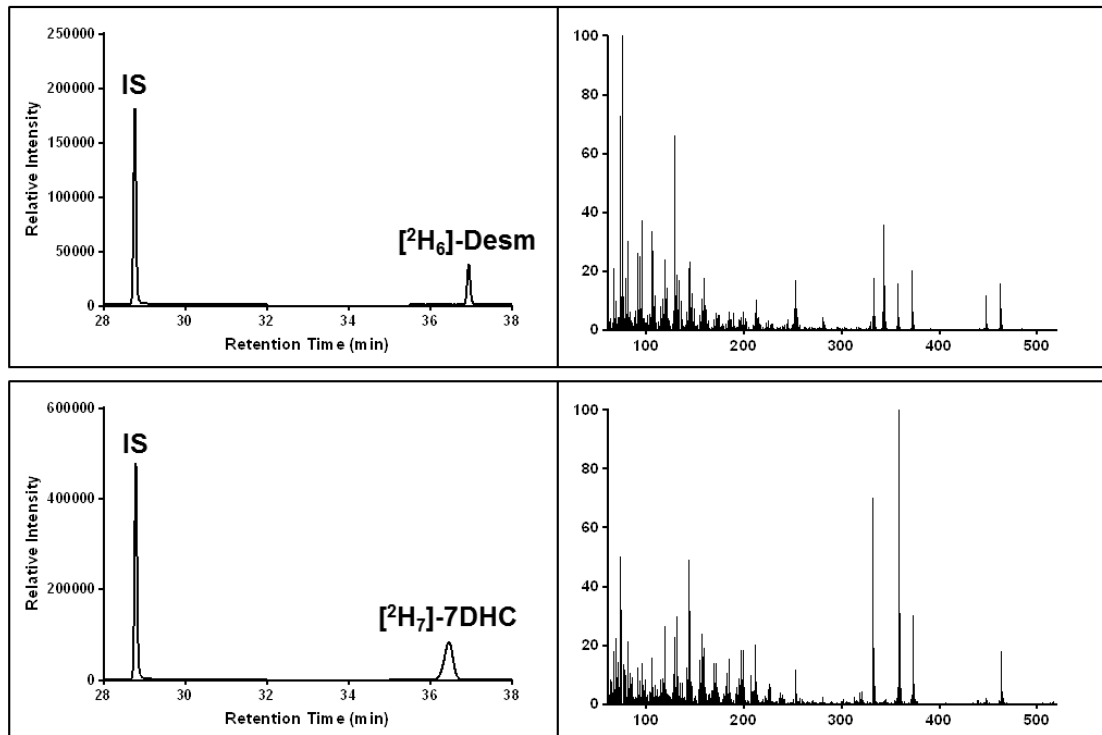

**C**

| Compound                               | Retention time (min) | Quantification/confirmation ion $m/z$ | Molecular ion $m/z$ |
|----------------------------------------|----------------------|---------------------------------------|---------------------|
| 5 $\alpha$ -Cholestane (IS)            | 28.92                | 217                                   | 372                 |
| $[^2\text{D}_6]$ -Cholesterol          | 34.57                | 374                                   | 464                 |
| $[^2\text{D}_6]$ -Desmosterol          | 37.08                | 333                                   | 462                 |
| $[^2\text{D}_7]$ -Cholesterol          | 34.53                | 336                                   | 465                 |
| $[^2\text{D}_7]$ -7-Dehydrocholesterol | 36.58                | 358                                   | 463                 |
| Cholesterol                            | 34.04                | 368                                   | 458                 |
| Desmosterol                            | 37.37                | 327                                   | 456                 |

## References

1. Bertin N, Simonis N, Dupuy D, Cusick ME, Han JD, Fraser HB, Roth FP, Vidal M (2007) Confirmation of organized modularity in the yeast interactome. *PLoS biology* 5 (6):e153. doi:10.1371/journal.pbio.0050153
2. Erce MA, Pang CN, Hart-Smith G, Wilkins MR (2012) The methylproteome and the intracellular methylation network. *Proteomics* 12 (4-5):564-586. doi:10.1002/pmic.201100397
