# Supplementary material
Source: PubMed Central journal article supplement (PMC4373745)
Supplement: supp_M056986_jlr.M056986-2.pdf [file supp_M056986_jlr.M056986-2.pdf]

### Supplementary Tables

**Supplementary Table 1.** The list of hamster cholesterol synthesis proteins used to generate an inclusion list for targeted LC-MS/MS

| Accession ID | Name             | Name description                                            |
|--------------|------------------|-------------------------------------------------------------|
| EGW05732     | Thiolase 2       | Acetyl-CoA acetyltransferase, cytosolic                     |
| EGW00729     | HMGCS            | Hydroxymethylglutaryl-CoA synthase, cytoplasmic             |
| EGW03272     | HMGCR            | 3-hydroxy-3-methylglutaryl-coenzyme A reductase             |
| EGW10615     | MK               | Mevalonate kinase                                           |
| EGV98107     | PMK              | Phosphomevalonate kinase                                    |
| EGV94082     | MVD              | Diphosphomevalonate decarboxylase                           |
| EGV95102     | IDI1             | Isopentenyl-diphosphate Delta-isomerase 1                   |
| EGV95103     | IDI2             | Isopentenyl-diphosphate Delta-isomerase 2                   |
| XP_003501631 | FPPS             | Farnesyl pyrophosphate synthase                             |
| XP_003509928 | GGPPS            | Geranylgeranyl pyrophosphate synthase                       |
| ERE90221     | SQS              | Squalene synthase                                           |
| EGV91499     | SM               | Squalene monooxygenase                                      |
| ERE88051     | LS               | Lanosterol synthase                                         |
| EGV95701     | LDM              | Lanosterol 14-alpha demethylase                             |
| EGW12250     | DHCR14           | Delta(14)-sterol reductase                                  |
| ERE72972     | LBR              | Lamin-B receptor                                            |
| ERE92332     | SC4MOL           | Methylsterol monooxygenase 1                                |
| EGW03873     | NSDHL            | Sterol-4-alpha-carboxylate 3-dehydrogenase, decarboxylating |
| ERE73196     | HSD17B7          | 3-keto-steroid reductase-like protein                       |
| XP_003505155 | Sterol isomerase | 3-beta-hydroxysteroid-Delta(8),Delta(7)-isomerase           |
| XP_003511419 | SC5D             | Lathosterol oxidase                                         |
| ERE81054     | DHCR7            | 7-dehydrocholesterol reductase                              |
| XP_003495787 | DHCR24           | 24-dehydrocholesterol reductase                             |

**Supplementary Table 2.** Cholesterol synthesis proteins identified by LC-MS/MS after DHCR24 immunoprecipitation

| Accession ID     | Name / Name description                  | Experiment           | Found? (peptide sequence(s) identified) | Protein coverage (%) | Mascot score                   | Expect (p-value) | Modifications | Precursor charge (+) | Observed m/z | Appm  | Missed cleavages |      |   |
|------------------|------------------------------------------|----------------------|-----------------------------------------|----------------------|--------------------------------|------------------|---------------|----------------------|--------------|-------|------------------|------|---|
| XP_003495787.1   | DHCR24 / 24-dehydrocholesterol reductase | IP1                  | Y                                       | 5.39                 | 82.75                          |                  |               |                      |              |       |                  |      |   |
|                  |                                          |                      | LTQGETLR                                |                      | 40                             | 2.40E-02         |               | 2                    | 459.25656    | 0.8   | 0                |      |   |
|                  |                                          |                      | LTQGETLRK                               |                      | 37                             | 2.70E-02         |               | 2                    | 523.30328    | -0.76 | 1                |      |   |
|                  |                                          |                      |                                         |                      | LNSIGNYYKPWFFK                 |                  | 56            | 4.60E-04             |              | 2     | 888.96008        | 1.15 | 0 |
|                  |                                          | IP2                  | Y                                       | 8.14                 | 196.93                         |                  |               |                      |              |       |                  |      |   |
|                  |                                          |                      | EGLEYIPLR                               |                      | 65                             | 3.90E-05         |               | 2                    | 545.30035    | -0.46 | 0                |      |   |
|                  |                                          |                      | FTHESQR                                 |                      | 37                             | 1.30E-02         |               | 2                    | 452.71722    | -0.01 | 0                |      |   |
|                  |                                          |                      | GLEFVLIHQQR                             |                      | 51                             | 4.10E-04         |               | 2                    | 606.34894    | 0.85  | 0                |      |   |
|                  |                                          |                      | LTQGETLR                                |                      | 47                             | 3.70E-03         |               | 2                    | 459.25613    | -0.13 | 0                |      |   |
|                  |                                          |                      | LTQGETLRK                               |                      | 43                             | 4.40E-03         |               | 2                    | 523.30334    | -0.64 | 1                |      |   |
|                  |                                          |                      | VKHFEAR                                 |                      | 37                             | 1.50E-02         |               | 2                    | 443.7482     | -0.31 | 1                |      |   |
|                  |                                          | IP3                  | Y                                       | 3.10                 | 51.96                          |                  |               |                      |              |       |                  |      |   |
|                  |                                          |                      | FTHESQR                                 |                      | 37                             | 1.10E-02         |               | 2                    | 452.7168     | -0.96 | 0                |      |   |
|                  |                                          |                      | LTQGETLRK                               |                      | 38                             | 1.60E-02         |               | 2                    | 523.30298    | -1.34 | 1                |      |   |
|                  |                                          |                      | LTQGETLR                                |                      | 40                             | 1.70E-02         |               | 2                    | 459.25638    | 0.4   | 0                |      |   |
|                  |                                          | IP3 (statin treated) | Y                                       | 3.10                 | 63.57                          |                  |               |                      |              |       |                  |      |   |
|                  |                                          |                      | FTHESQR                                 |                      | 40                             | 5.70E-03         |               | 2                    | 452.71677    | -1.02 | 0                |      |   |
|                  |                                          |                      | LTQGETLRK                               |                      | 36                             | 2.30E-02         |               | 2                    | 523.30316    | -0.99 | 1                |      |   |
|                  |                                          |                      | LTQGETLR                                |                      | 39                             | 2.00E-02         |               | 2                    | 459.25604    | -0.33 | 0                |      |   |
|                  |                                          | IP4 (statin treated) | Y                                       | 17.05                | 698.73                         |                  |               |                      |              |       |                  |      |   |
|                  |                                          |                      | EGLEYIPLR                               |                      | 51                             | 9.70E-04         |               | 2                    | 545.30066    | 0.1   | 0                |      |   |
| FTHESQR          |                                          |                      | 40                                      | 5.60E-03             |                                | 2                | 452.71683     | -0.89                | 0            |       |                  |      |   |
| GLEFVLIHQQR      |                                          |                      | 41                                      | 3.90E-03             |                                | 2                | 606.34845     | 0.04                 | 0            |       |                  |      |   |
| HVENYLK          |                                          |                      | 36                                      | 3.40E-02             |                                | 2                | 451.74002     | -0.33                | 0            |       |                  |      |   |
| HYYHR            |                                          |                      | 29                                      | 1.50E-02             |                                | 2                | 388.18539     | 0.12                 | 0            |       |                  |      |   |
| LTQGETLR         |                                          |                      | 50                                      | 1.70E-03             |                                | 2                | 459.25598     | -0.46                | 0            |       |                  |      |   |
| LTQGETLRK        |                                          |                      | 45                                      | 2.40E-03             |                                | 2                | 523.30334     | -0.64                | 1            |       |                  |      |   |
| LYEQHHVVQDMLVPMK |                                          |                      | 41                                      | 8.80E-03             | M11(Oxidation); M15(Oxidation) | 3                | 666.99731     | -0.14                | 0            |       |                  |      |   |
| NIMINLMDILEVDTKK |                                          |                      | 75                                      | 4.00E-06             | M3(Oxidation); M7(Oxidation)   | 2                | 961.50012     | -2.32                | 1            |       |                  |      |   |
| TNREGLEYIPLR     |                                          |                      | 45                                      | 4.10E-03             |                                | 2                | 730.89783     | 1.86                 | 1            |       |                  |      |   |
| ERE81054         | DHCR7 / 7-dehydrocholesterol reductase   | IP1                  | Y                                       | 2.32                 | 39.25                          |                  |               |                      |              |       |                  |      |   |
|                  |                                          |                      | LLVSGFWGVAR                             |                      | 39                             | 1.30E-02         |               | 2                    | 602.84589    | 0.6   | 0                |      |   |
|                  |                                          | IP2                  | Y**                                     | 7.01                 | 93.06                          |                  |               |                      |              |       |                  |      |   |
|                  |                                          |                      | FLPGYVGGVQEGAVTPAGVVNK                  |                      | 46                             | 2.00E-03         |               | 2                    | 1080.08374   | 4.89  | 0                |      |   |
|                  |                                          |                      | LLVSGFWGVAR                             |                      | 39                             | 8.80E-03         |               | 2                    | 602.84589    | 0.6   | 0                |      |   |
|                  |                                          | IP3                  | Y                                       | 2.32                 | 59.04                          |                  |               |                      |              |       |                  |      |   |
|                  |                                          |                      | LLVSGFWGVAR                             |                      | 41                             | 6.20E-03         |               | 2                    | 602.8457     | 0.3   | 0                |      |   |
|                  |                                          | IP3 (statin treated) | Y*                                      | 2.32                 | 25.40                          |                  |               |                      |              |       |                  |      |   |
|                  |                                          |                      | LLVSGFWGVAR                             |                      | 25                             | 2.20E-01         |               | 2                    | 602.84583    | 0.5   | 0                |      |   |
|                  |                                          | IP4 (statin treated) | Y*                                      | 1.81                 | 29.28                          |                  |               |                      |              |       |                  |      |   |
| YTATVPYR         |                                          |                      | 24                                      | 2.10E-01             |                                | 2                | 485.75381     | 1.11                 | 0            |       |                  |      |   |

| Accession ID | Name / Name description                                 | Experiment           | Found? (peptide sequence(s) identified) | Protein coverage (%) | Mascot score | Expect (p-value)       | Modifications | Precursor charge (+) | Observed m/z | Appm  | Missed cleavages |
|--------------|---------------------------------------------------------|----------------------|-----------------------------------------|----------------------|--------------|------------------------|---------------|----------------------|--------------|-------|------------------|
| ERE90221     | SQS / Squalene synthase                                 | IP1                  | N                                       | -                    | -            |                        |               |                      |              |       |                  |
|              |                                                         | IP2                  | Y                                       | 2.99                 | 48.40        |                        |               |                      |              |       |                  |
|              |                                                         |                      | SFAAVIQALDGEIR                          |                      | 40           | 1.00E-02               |               | 2                    | 745.40411    | -0.03 | 0                |
|              |                                                         | IP3                  | N                                       | -                    | -            |                        |               |                      |              |       |                  |
|              |                                                         | IP3 (statin treated) | Y                                       | 2.99                 | 34.29        |                        |               |                      |              |       |                  |
|              |                                                         |                      | QVLEDFPTISLEFR                          |                      | 34.00        | 4.00E-02               |               | 2                    | 847.44324    | -0.26 | 0                |
| EGW05732     | Thiolase 2 / Acetyl-CoA acetyltransferase, cytosolic    | IP4 (statin treated) | Y                                       | 2.13                 | 59.54        |                        |               |                      |              |       |                  |
|              |                                                         |                      | DYLEDQQEGR                              |                      | 40           | 3.60E-03               |               | 2                    | 626.77698    | 2.07  | 0                |
|              |                                                         | IP1                  | Y                                       | 6.80                 | 105.71       |                        |               |                      |              |       |                  |
|              |                                                         |                      | DFSATDLTEFAAR                           |                      | 71           | 9.00E-06               |               | 2                    | 722.34222    | 1.42  | 0                |
|              |                                                         |                      | LEDTLWAGLTDQHVK                         |                      | 35           | 5.30E-02               |               | 2                    | 863.44415    | 0.19  | 0                |
|              |                                                         | IP2                  | Y                                       | 14.11                | 133.91       |                        |               |                      |              |       |                  |
| EGW03272     | HMGCR / 3-hydroxy-3-methylglutaryl-coenzyme A reductase |                      | AGIPKEEVK                               |                      | 31           | 4.80E-02               |               | 2                    | 485.7818     | -0.52 | 1                |
|              |                                                         |                      | EVYMGNVLQGGEGQAPTR                      |                      | 60           | 9.20E-05 M4(Oxidation) |               | 2                    | 961.4588     | 1.55  | 0                |
|              |                                                         |                      | LGSIAIQGAIEK                            |                      | 49           | 8.50E-04               |               | 2                    | 600.35352    | 0.23  | 0                |
|              |                                                         |                      | TPIGSFMGSLASQPATK                       |                      | 64           | 4.60E-05 M7(Oxidation) |               | 2                    | 854.93225    | -0.18 | 0                |
|              |                                                         | IP3                  | N                                       | -                    | -            |                        |               |                      |              |       |                  |
|              |                                                         | IP3 (statin treated) | N                                       | -                    | -            |                        |               |                      |              |       |                  |
|              |                                                         | IP4 (statin treated) | N                                       | -                    | -            |                        |               |                      |              |       |                  |
|              |                                                         | IP1                  | N                                       | -                    | -            |                        |               |                      |              |       |                  |
|              |                                                         | IP2                  | N                                       | -                    | -            |                        |               |                      |              |       |                  |
|              |                                                         | IP3                  | N                                       | -                    | -            |                        |               |                      |              |       |                  |
| EGV91499     | SQLE / Squalene monooxygenase                           | IP3 (statin treated) | N*                                      | -                    | -            |                        |               |                      |              |       |                  |
|              |                                                         | IP4 (statin treated) | Y**                                     | 6.59                 | 417.98       |                        |               |                      |              |       |                  |
|              |                                                         |                      | ATFVLGASGTSPVAAR                        |                      | 50           | 1.10E-03               |               | 2                    | 801.4364     | 0.53  | 0                |
|              |                                                         |                      | FLSDAEIHQLVNAK                          |                      | 58           | 1.30E-04               |               | 2                    | 780.93439    | -1.13 | 0                |
|              |                                                         |                      | LPEPSSLQYLPYR                           |                      | 38           | 1.60E-02               |               | 2                    | 781.91498    | 0.84  | 0                |
|              |                                                         |                      | LSSVEEPEGVSQDR                          |                      | 70           | 6.90E-06               |               | 2                    | 766.36652    | 1.45  | 0                |
| ERE72972     | LBR / Lamin-B receptor                                  | IP1                  | N                                       | -                    | -            |                        |               |                      |              |       |                  |
|              |                                                         | IP2                  | N                                       | -                    | -            |                        |               |                      |              |       |                  |
|              |                                                         | IP3                  | N                                       | -                    | -            |                        |               |                      |              |       |                  |
|              |                                                         | IP3 (statin treated) | N                                       | -                    | -            |                        |               |                      |              |       |                  |
|              |                                                         | IP4 (statin treated) | Y**                                     | 14.44                | 116.61       |                        |               |                      |              |       |                  |
|              |                                                         |                      | EAFLEASQSAR                             |                      | 68           | 1.70E-05               |               | 2                    | 604.80005    | 1.8   | 0                |
| EGW05732     | Thiolase 2 / Acetyl-CoA acetyltransferase, cytosolic    |                      | ELHAPLTVVADGLFSK                        |                      | 41           | 6.10E-03               |               | 2                    | 848.96912    | 2.37  | 0                |
|              |                                                         | IP1                  | N                                       | -                    | -            |                        |               |                      |              |       |                  |
|              |                                                         | IP2                  | Y                                       | 5.49                 | 204.02       |                        |               |                      |              |       |                  |
|              |                                                         |                      | VPAPLETFQVTTTPQR                        |                      | 63           | 4.30E-05               |               | 2                    | 842.45831    | 1.68  | 0                |
|              |                                                         |                      | DELSPASSGNAVYDFFIGR                     |                      | 74           | 4.10E-06               |               | 2                    | 1022.98523   | 0.99  | 0                |
|              |                                                         | IP3                  | N                                       | -                    | -            |                        |               |                      |              |       |                  |
| EGW05732     | Thiolase 2 / Acetyl-CoA acetyltransferase, cytosolic    | IP3 (statin treated) | N                                       | -                    | -            |                        |               |                      |              |       |                  |
|              |                                                         | IP4 (statin treated) | N                                       | -                    | -            |                        |               |                      |              |       |                  |

| Accession ID | Name / Name description                                             | Experiment           | Found? (peptide sequence(s) identified) | Protein coverage (%) | Mascot score | Expect ( <i>p</i> -value) | Modifications | Precursor charge (+) | Observed <i>m/z</i> | Δppm      | Missed cleavages |
|--------------|---------------------------------------------------------------------|----------------------|-----------------------------------------|----------------------|--------------|---------------------------|---------------|----------------------|---------------------|-----------|------------------|
| ERE73196     | HSD17B7 / 3-keto-steroid reductase-like protein                     | IP1                  | N                                       | -                    | -            |                           |               |                      |                     |           |                  |
|              |                                                                     | IP2                  | N                                       | -                    | -            |                           |               |                      |                     |           |                  |
|              |                                                                     | IP3                  | N                                       | -                    | -            |                           |               |                      |                     |           |                  |
|              |                                                                     | IP3 (statin treated) | N                                       | -                    | -            |                           |               |                      |                     |           |                  |
|              |                                                                     | IP4 (statin treated) | Y                                       | YLSSTTGFGTNYVR       | 4.20         | 38.33                     | 1.70E-02      |                      | 2                   | 783.38336 | -0.02            |
| EGW03873     | NSDHL / Sterol-4-alpha-carboxylate-3-dehydrogenase, decarboxylating | IP1                  | N                                       | -                    | -            |                           |               |                      |                     |           |                  |
|              |                                                                     | IP2                  | N                                       | -                    | -            |                           |               |                      |                     |           |                  |
|              |                                                                     | IP3                  | N                                       | -                    | -            |                           |               |                      |                     |           |                  |
|              |                                                                     | IP3 (statin treated) | N                                       | -                    | -            |                           |               |                      |                     |           |                  |
|              |                                                                     | IP4 (statin treated) | Y                                       | DPQLVPILIDAAR        | 6.25         | 41.75                     | 3.20E-03      |                      | 2                   | 710.91064 | -1.34            |

**Notes:** Data from IP1 and IP2 were generated from a limited number of gel bands. Y, protein found; Y\*, protein inferred from a peptide identified with a Mascot Expect value > 0.05, as MS/MS spectra derived from this peptide match those obtained in other experiments where the same peptide was identified with a higher Mascot Ion Score; Y\*\*, protein found in EV as well, but with fewer peptide hits in EV; N, protein not found; N\*, protein found with more peptide hits in EV (data omitted). The Mascot scores, protein coverage, and number of peptide matches are all derived from peptides identified with Mascot Expect values < 0.05, except for underlined scores.
